# Supplementary material
Source: PubMed Central journal article supplement (PMC3042865)
Supplement: supp_138.6.1069_DEV059501TableS1.pdf [file supp_138.6.1069_DEV059501TableS1.pdf]

**Table S1. HTA is strictly maternal effect**

| Genotype                  | Maternal (M) Zygotic (Z) | % Arrest at 26°C (n) |
|---------------------------|--------------------------|----------------------|
| lin-35(n745)/+            | M+Z+                     | 1.6 (251)            |
| lin-35(n745)/lin-35(n745) | M+Z-                     | 2.5 (115)            |
| lin-35(n745)/lin-35(n745) | M-Z-                     | 97.8 (359)           |
| lin-35(n745)/+            | M-Z+                     | 3.2 (281)            |
| lin-37(n758)/+            | M+Z+                     | 1.5 (129)            |
| lin-37(n758)/lin-37(n758) | M+Z-                     | 2.6 (75)             |
| lin-37(n758)/lin-37(n758) | M-Z-                     | 96.5 (536)           |
| lin-37(n758)/+            | M-Z+                     | 5.6 (623)            |
