# Supplementary material
Source: PubMed Central journal article supplement (PMC3042865)
Supplement: supp_138.6.1069_DEV059501TableS2.pdf [file supp_138.6.1069_DEV059501TableS2.pdf]

**Table S2. Changes in somatic P-granule protein expression with temperature and feeding\***

|                       | PGL-3              |                    |                      |                       | GLH-1              |                    |                      |                       | PGL-1              |                    |                      |                       |
|-----------------------|--------------------|--------------------|----------------------|-----------------------|--------------------|--------------------|----------------------|-----------------------|--------------------|--------------------|----------------------|-----------------------|
|                       | Worms <sup>†</sup> | Cells <sup>‡</sup> | Quality <sup>§</sup> | Punctae? <sup>¶</sup> | Worms <sup>†</sup> | Cells <sup>‡</sup> | Quality <sup>§</sup> | Punctae? <sup>¶</sup> | Worms <sup>†</sup> | Cells <sup>‡</sup> | Quality <sup>§</sup> | Punctae? <sup>¶</sup> |
| <b><i>dpl-1</i></b>   |                    |                    |                      |                       |                    |                    |                      |                       |                    |                    |                      |                       |
| 26°C fed              | +++++              | +++++              | Bright               | No                    | ++++               | ++                 | Mid                  | No                    | ++++               | ++++               | Mid                  | No                    |
| 26°C starved          | +++++              | +++++              | Bright               | No                    | ++                 | +                  | Faint                | No                    | ++++               | ++++               | Faint                | No                    |
| 20°C fed              | +++                | ++++               | Mid                  | No                    | +                  | +                  | Faint                | No                    | ++++               | ++++               | Mid                  | No                    |
| <b><i>hpl-2</i></b>   |                    |                    |                      |                       |                    |                    |                      |                       |                    |                    |                      |                       |
| 26°C fed              | +++++              | ++++               | Bright               | Yes                   | +++++              | +++++              | Bright               | Yes                   | +++++              | ++++               | Bright               | Yes                   |
| 26°C starved          | +++                | +++                | Mid                  | Some                  | ++++               | +++                | Mid                  | Some                  | ++++               | +++                | Mid                  | Some                  |
| 20°C fed              | +                  | +                  | Faint                | No                    | +                  | +                  | Faint                | No                    | +                  | +                  | Faint                | No                    |
| <b><i>lin-9</i></b>   |                    |                    |                      |                       |                    |                    |                      |                       |                    |                    |                      |                       |
| 26°C fed              | +++++              | +++++              | Bright               | Some                  | +++++              | ++++               | Bright               | No                    | ++++               | ++                 | Mid                  | Some                  |
| 26°C starved          | +++++              | +++++              | Bright               | Some                  | ++++               | ++                 | Bright               | No                    | +                  | +                  | Faint                | No                    |
| 20°C fed              | ++++               | ++++               | Bright               | Some                  | ++                 | +                  | Faint                | No                    | +                  | +                  | Faint                | No                    |
| <b><i>lin-13</i></b>  |                    |                    |                      |                       |                    |                    |                      |                       |                    |                    |                      |                       |
| 26°C fed              | +++++              | ++++               | Bright               | Yes                   | +++++              | ++++               | Bright               | Some                  | +++++              | +++                | Mid                  | Yes                   |
| 26°C starved          | ++++               | +++                | Mid                  | Some                  | +++++              | ++++               | Bright               | Some                  | ++                 | ++                 | Faint                | Some                  |
| 20°C fed              | ++                 | +                  | Faint                | No                    | -                  | -                  | None                 | NA                    | ++                 | ++                 | Faint                | No                    |
| <b><i>lin-15B</i></b> |                    |                    |                      |                       |                    |                    |                      |                       |                    |                    |                      |                       |
| 26°C fed              | +++++              | +++++              | Bright               | Yes                   | ++++               | +++                | Bright               | Some                  | ++++               | ++                 | Mid                  | Some                  |
| 26°C starved          | +++++              | +++++              | Bright               | Some                  | ++                 | +                  | Faint                | No                    | ++++               | ++                 | Faint                | Some                  |
| 20°C fed              | +++++              | +++++              | Bright               | Some                  | +                  | +                  | Faint                | No                    | ++++               | ++                 | Faint                | Some                  |
| <b><i>lin-35</i></b>  |                    |                    |                      |                       |                    |                    |                      |                       |                    |                    |                      |                       |
| 26°C fed              | +++++              | +++++              | Bright               | Some                  | ++++               | +++                | Mid                  | No                    | +++++              | +++++              | Mid                  | No                    |
| 26°C starved          | +++++              | +++++              | Bright               | Some                  | ++                 | ++                 | Faint                | No                    | +++++              | ++++               | Mid                  | No                    |
| 20°C fed              | +++++              | +++++              | Bright               | Yes                   | ++++               | +++                | Faint                | No                    | +++++              | ++++               | Mid                  | Some                  |
| <b><i>lin-37</i></b>  |                    |                    |                      |                       |                    |                    |                      |                       |                    |                    |                      |                       |
| 26°C fed              | +++++              | +++++              | Bright               | No                    | ++++               | ++                 | Bright               | No                    | ++++               | ++                 | Mid                  | No                    |
| 26°C starved          | +++++              | +++++              | Bright               | No                    | +++                | ++                 | Mid                  | No                    | ++                 | +                  | Faint                | No                    |
| 20°C fed              | +++                | +++                | Mid                  | No                    | ++                 | ++                 | Faint                | No                    | +                  | +                  | Faint                | No                    |
| <b><i>lin-54</i></b>  |                    |                    |                      |                       |                    |                    |                      |                       |                    |                    |                      |                       |
| 26°C fed              | +++++              | +++++              | Bright               | Some                  | ++++               | ++++               | Bright               | No                    | ++++               | ++                 | Mid                  | No                    |
| 26°C starved          | +++++              | +++++              | Bright               | No                    | +++                | +++                | Mid                  | No                    | +                  | +                  | Faint                | No                    |
| 20°C fed              | +++                | +                  | Faint                | No                    | ++                 | +                  | Faint                | No                    | ++                 | +                  | Faint                | No                    |
| <b><i>lin-61</i></b>  |                    |                    |                      |                       |                    |                    |                      |                       |                    |                    |                      |                       |
| 26°C fed              | +++                | +                  | Mid                  | No                    | ++++               | +++                | Bright               | No                    | +++                | +                  | Mid                  | No                    |
| 26°C starved          | +                  | +                  | Faint                | No                    | +++                | +++                | Mid                  | Some                  | +                  | +                  | Faint                | No                    |
| 20°C fed              | +                  | +                  | Faint                | No                    | -                  | -                  | None                 | NA                    | ++                 | +                  | Faint                | No                    |

\*synMuv B mutants show differences in the quality and quantity of ectopic P-granule protein expression in the soma of L1 larvae. PGL-3; GLH-1 and PGL-1 staining was scored after growth at 20°C and 26°C; and after L1s were hatched in the absence of food and then either starved or fed for an additional 5 hours. Most genotypes showed higher #worms; #cells and level of expression with feeding and at higher temperature; especially with GLH-1 and PGL-1 staining.

<sup>†</sup>Proportion of worms in the population that had some level of somatic expression; ranging from + (low proportion) to +++++ (high proportion).

<sup>‡</sup>Proportion of somatic cells within a worm that showed expression; ranging from + (low proportion) to +++++ (high proportion).

<sup>§</sup>Quality: level of ectopic expression; ranging from Faint to Bright.

<sup>¶</sup>Whether or not P-granule proteins aggregated into punctate structures.

NA, not applicable.
