# Supplementary material
Source: PubMed Central journal article supplement (PMC3042865)
Supplement: supp_138.6.1069_DEV059501TableS3.pdf [file supp_138.6.1069_DEV059501TableS3.pdf]

**Table S3. Suppression of high temperature arrest (HTA) by genetic mutations in *mes-4* and *mrg-1***

| Parent genotype                            | Percentage of L1 progeny that grew to adulthood at 26°C (n) |
|--------------------------------------------|-------------------------------------------------------------|
| <i>lin-15B(n744)</i>                       | 0 (43)                                                      |
| <i>mes-4(bn85)</i>                         | 85 (34)                                                     |
| <i>mes-4(bn85)/DnT1GFP; lin-15B(n744)</i>  | 0 (127)                                                     |
| <i>mes-4(bn85); lin-15B(n744)</i>          | 35 (107)                                                    |
| <i>mrg-1(qa6200)/qC1GFP</i>                | 23 (232)                                                    |
| <i>mrg-1(qa6200)/qC1GFP; lin-15B(n744)</i> | 23 (535)                                                    |

*mes-4(bn85)* was able to suppress the HTA phenotype, but only did so in a maternal effect manner. *mes-4(bn85); lin-15B(n744)* homozygous F1 progeny from a *mes-4(bn85)/+* heterozygous mother showed no suppression of HTA, whereas *mes-4(bn85); lin-15B(n744)* homozygous F1 progeny from a *mes-4(bn85); lin-15B(n744)* homozygous mothers showed some suppression of the HTA phenotype (lines 1-4). By contrast, *mrg-1(qa6200)* was able to suppress *lin-15B(n744)* HTA in a non-maternal effect manner such that an equivalent amount of *mrg-1(qa6200)* homozygous F1 progeny grew to adulthood from *mrg-1(qa6200)/qC1GFP* and *mrg-1(qa6200)/qC1GFP; lin-15B(n744)* mothers (lines 5,6).
