# Supplementary material
Source: PubMed Central journal article supplement (PMC3042865)

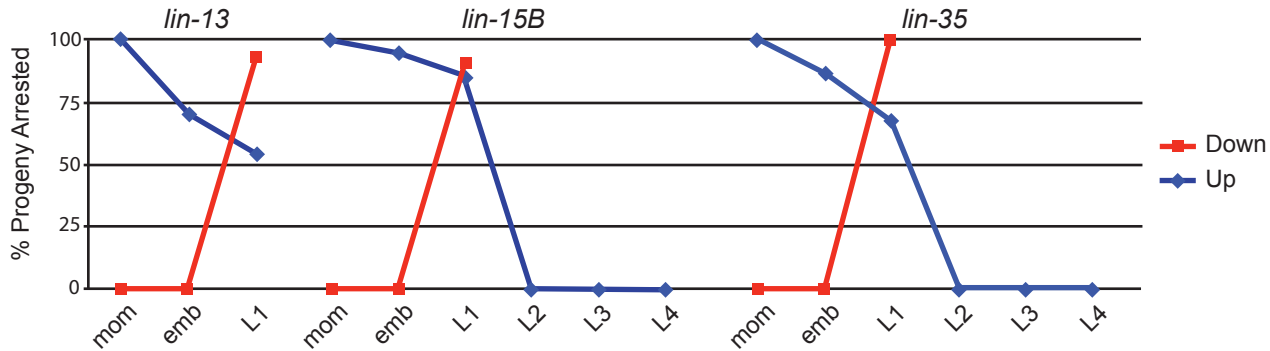

Supplement: supp_138.6.1069_DEV059501FigS1.pdf [file supp_138.6.1069_DEV059501FigS1.pdf]

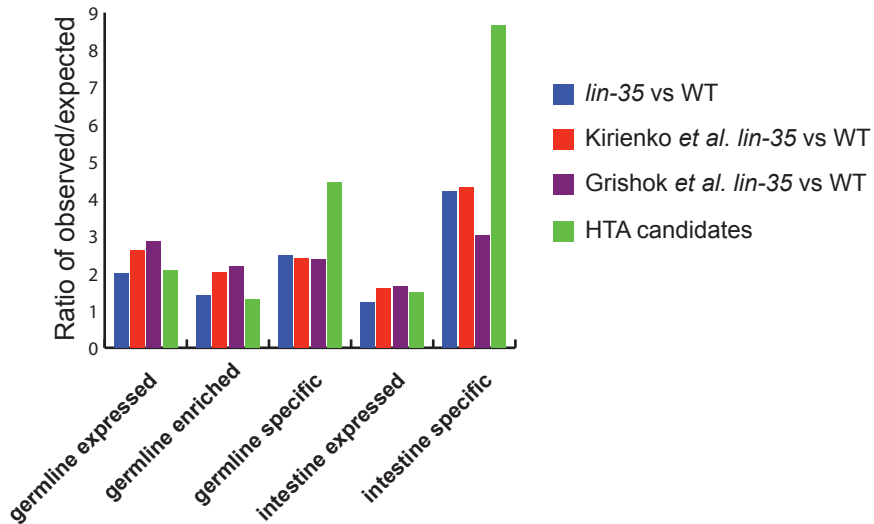

Supplement: supp_138.6.1069_DEV059501FigS2.pdf [file supp_138.6.1069_DEV059501FigS2.pdf]

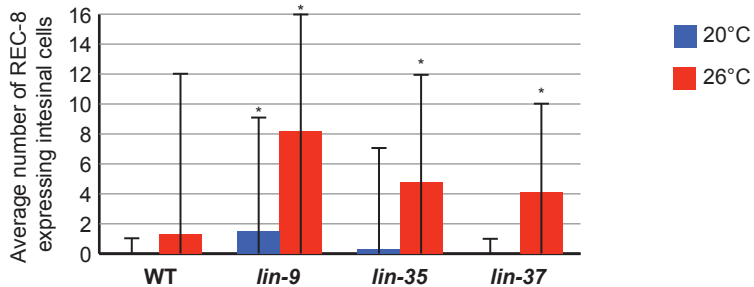

Supplement: supp_138.6.1069_DEV059501FigS3.pdf [file supp_138.6.1069_DEV059501FigS3.pdf]

26°C Starved

26°C Fed

20°C Fed

WT

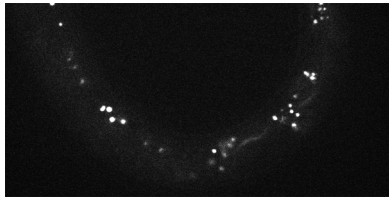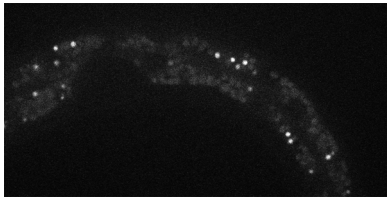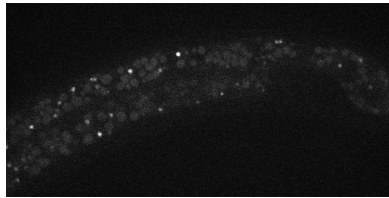

*lin-15B*

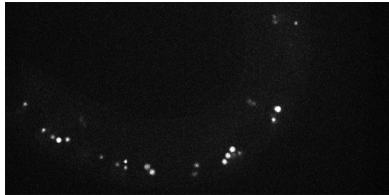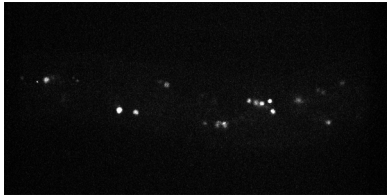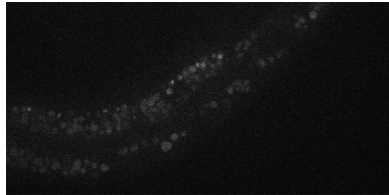

*lin-35*

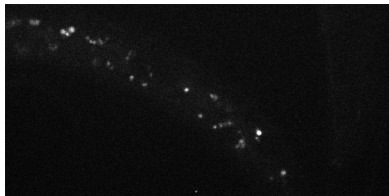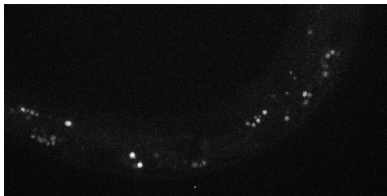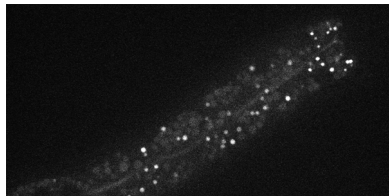

Supplement: supp_138.6.1069_DEV059501FigS4.pdf [file supp_138.6.1069_DEV059501FigS4.pdf]

PGL-1

LIN-35::GFP

PGL-1 LIN-35::GFP

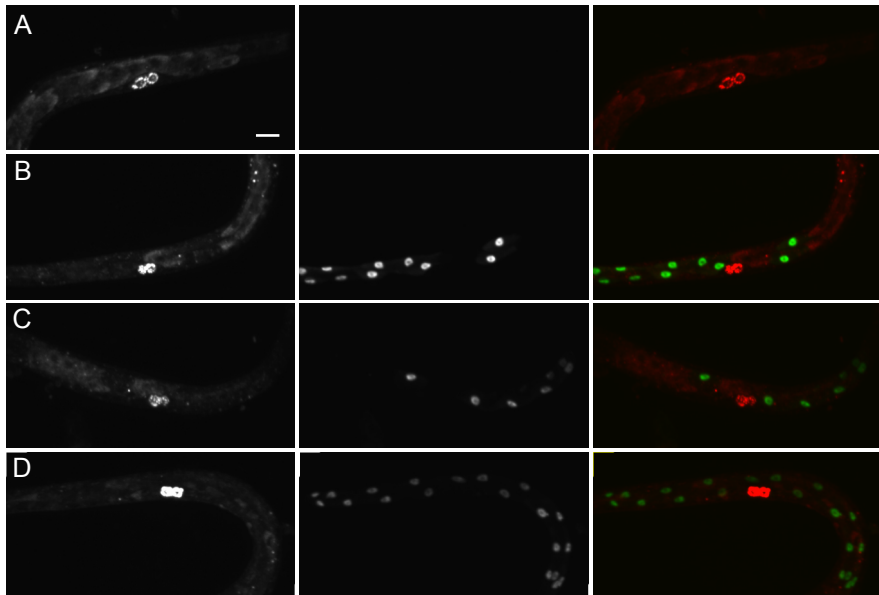

Supplement: supp_138.6.1069_DEV059501FigS5.pdf [file supp_138.6.1069_DEV059501FigS5.pdf]
